# Supplementary material for: Downregulation of miR‑10b‑5p facilitates the proliferation of uterine leiomyosarcoma cells: A microRNA sequencing‑based approach
Source: PubMed Central journal article supplement — Oncol Rep. 2023 Mar 13;49(5):86. doi: 10.3892/or.2023.8523 (PMC10073409; doi:10.3892/or.2023.8523), 2023-03-13

Figure S1. Effect of miR-29a-3p, miR-126-3p and miR-186-5p on leiomyosarcoma-derived cell lines. (A) The relative expression of miR-29a-3p and (B) the proliferation of miR-29a-3p-transfected cells was determined. (C) The relative expression of miR-126-3p and (D) the proliferation of miR-126-3p-transfected cells was determined. (E) The relative expression of miR-186-5p and (F) the proliferation of miR-186-5p-transfected cells was determined. Cell proliferation was measured at 24, 48 and 72 h, and the luminescence was compared using Welch's t-test. Error bars represent the standard errors of the mean. \* $P < 0.05$ , \*\* $P < 0.01$  and \*\*\* $P < 0.001$ . miR, microRNA; NC, negative control.

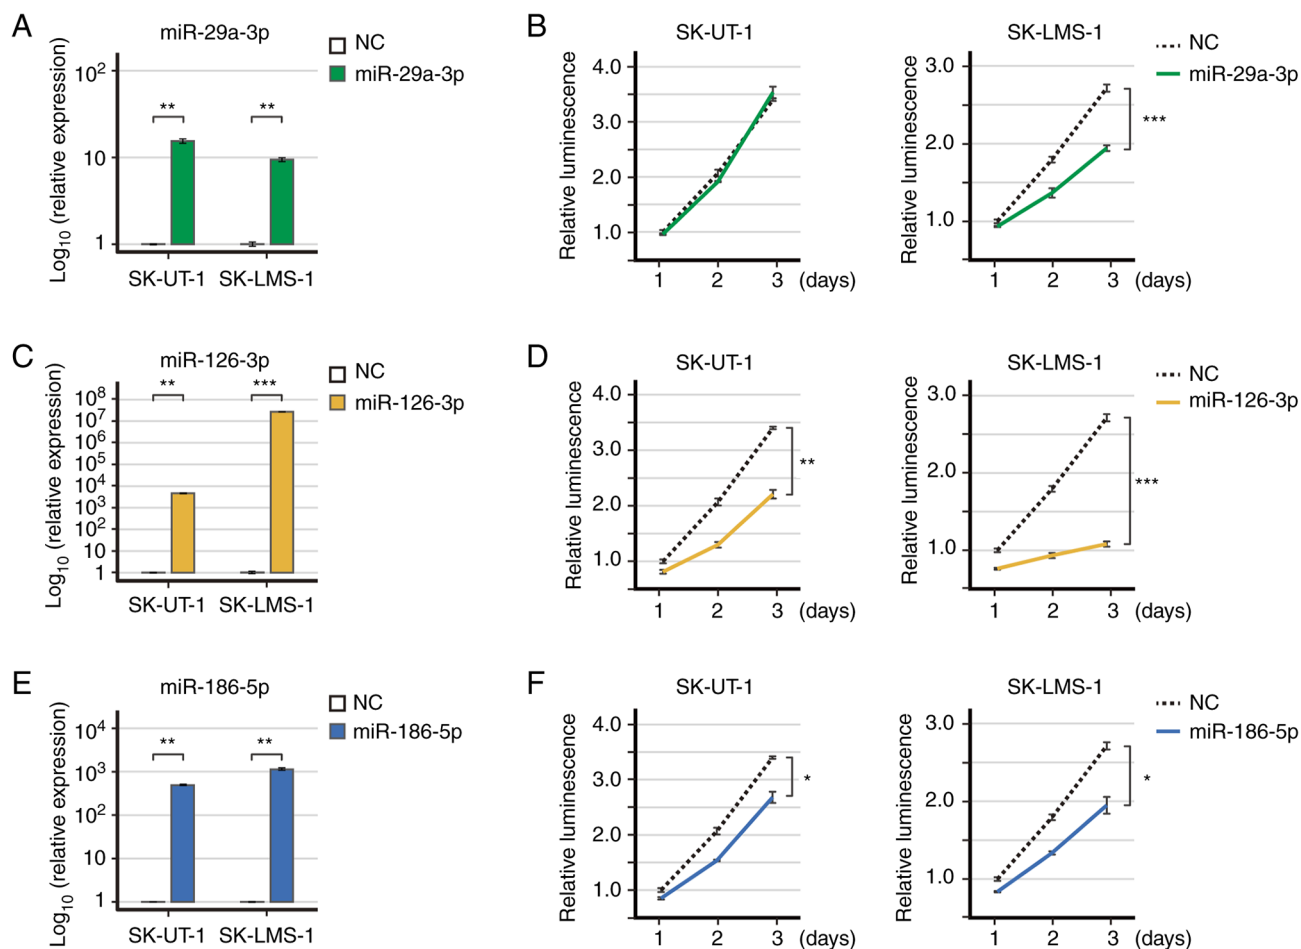

Figure S2. Representative images of soft agar colony formation assay of cells overexpressing miR-10b-5p. Transfected cells were seeded in 6-well plates (3,000 cells/well) and cultured in soft agar media for 14 days. Scale bars, 200  $\mu$ m. miR, microRNA; NC, negative control.

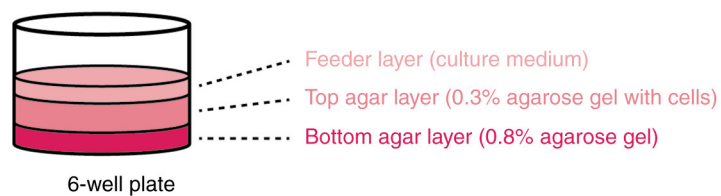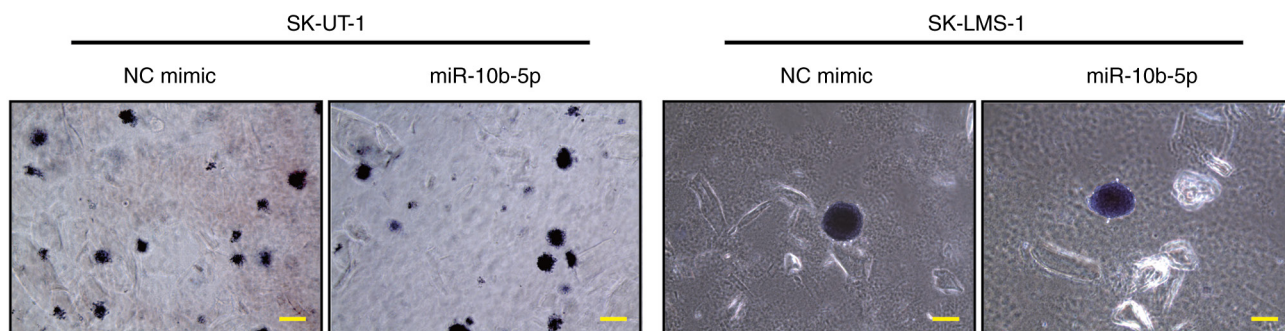

Supplement: Supplementary_Data1.pdf [file Supplementary_Data1.pdf]
